# Supplementary material for: Integrated high-performance microcapsule fire extinguishing system for confined spaces with real-time monitoring and early warning capabilities
Source: Royal Society of Chemistry journal article supplement (doi:10.1039/d5lc01053e), 2025-12-30
Supplement: d5lc01053e6.pdf [file d5lc01053e6.pdf]

## Supporting Information

### **Integrated High-Performance Microcapsule Fire Extinguishing System for Confined Spaces with Real-Time Monitoring and Early Warning Capabilities**

Qiaosheng Pan,<sup>1,#</sup> Jiachao Zhang,<sup>1,#</sup> Jijie Fu,<sup>2</sup> Ning Sang,<sup>3</sup> Dang Ding,<sup>3</sup> Peng Zhang,<sup>4</sup>  
Chen Li,<sup>2,3</sup> Tianpei Zhou,<sup>5</sup> Ting Si,<sup>2,\*</sup> Fangsheng Huang,<sup>3,\*</sup> Zhiqiang Zhu<sup>3,6,7,\*</sup>

<sup>1</sup> School of Instrument Science and Opto-electronics Engineering, Hefei University of Technology, Hefei, Anhui 230009, China

<sup>2</sup> Department of Modern Mechanics, University of Science and Technology of China, Hefei, Anhui 230026, China

<sup>3</sup> Institute of Advanced Technology, University of Science and Technology of China, Hefei, Anhui 230088, China

<sup>4</sup> College of Electrical Engineering and Automation, Anhui University, Hefei, Anhui 230601, China

<sup>5</sup> Key Laboratory of Precision and Intelligent Chemistry, University of Science and Technology of China, Hefei, Anhui 230026, China

<sup>6</sup> Department of Precision Machinery and Precision Instrumentation, University of Science and Technology of China, Hefei, Anhui 230026, China

<sup>7</sup> Department of Plastic Surgery, The First Affiliated Hospital of USTC, Division of Life Sciences and Medicine, University of Science and Technology of China, Hefei, Anhui, 230001, China

# These authors contributed equally to this work.

Corresponding Authors

\* E-mail: tsi@ustc.edu.cn

\* E-mail: huangfs@ustc.edu.cn

\* E-mail: zqzhu2017@ustc.edu.cn

## 1. Supporting Figures

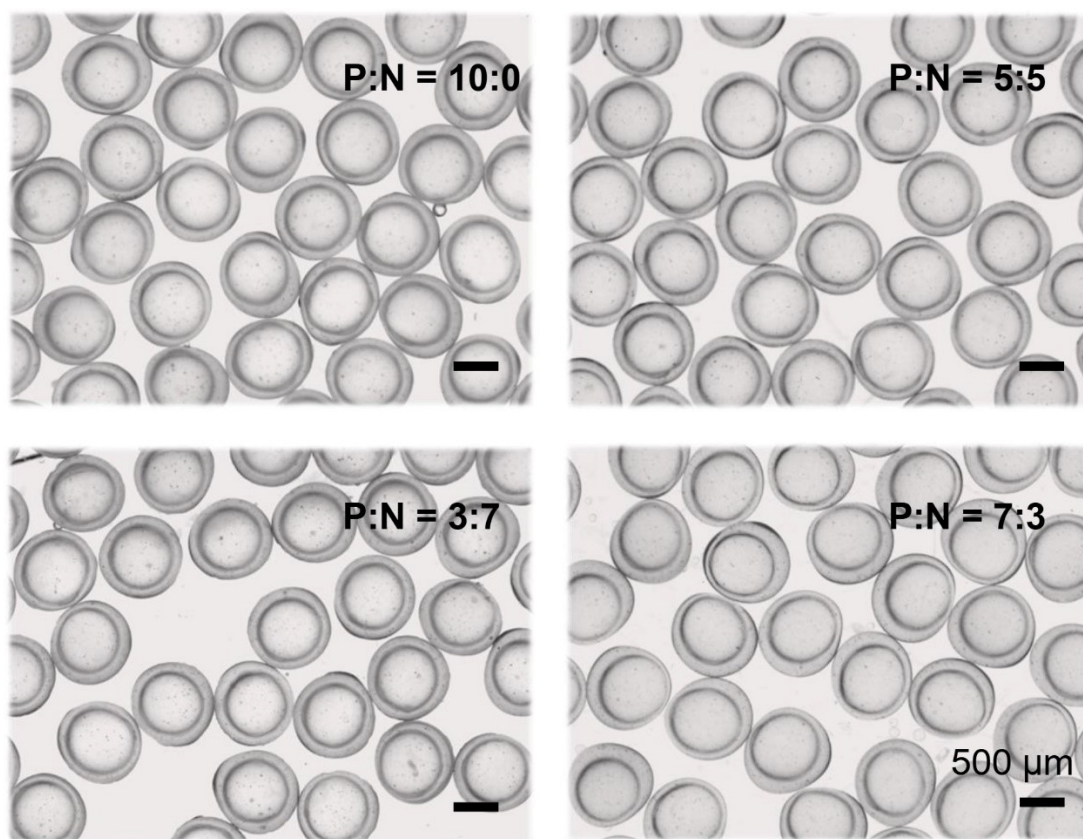

**Fig. S1** Microscopic images of other composite microcapsules.

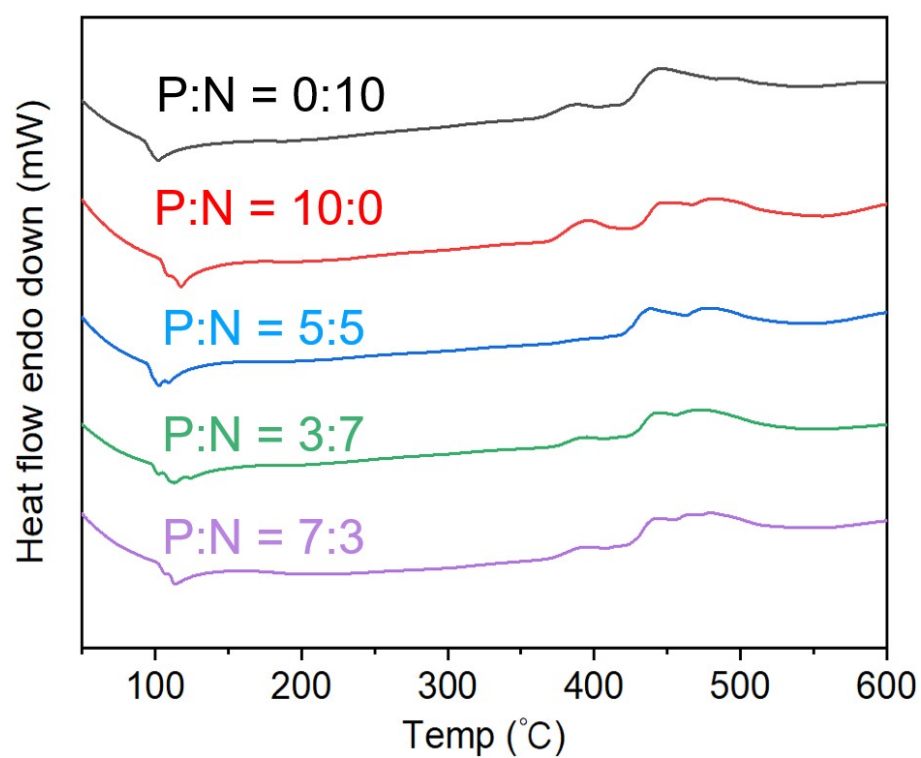

**Fig. S2** DSC curves of composite fire extinguishing microcapsules with different proportions.

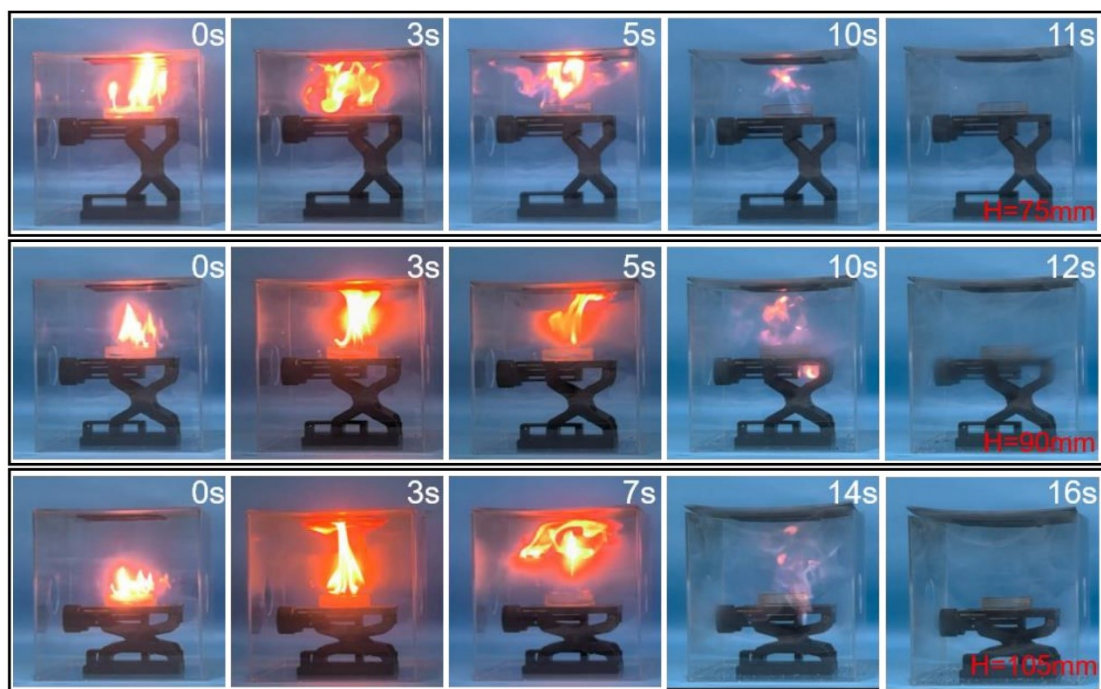

**Fig. S3** Actual images of fire extinguishing patches at different heights.

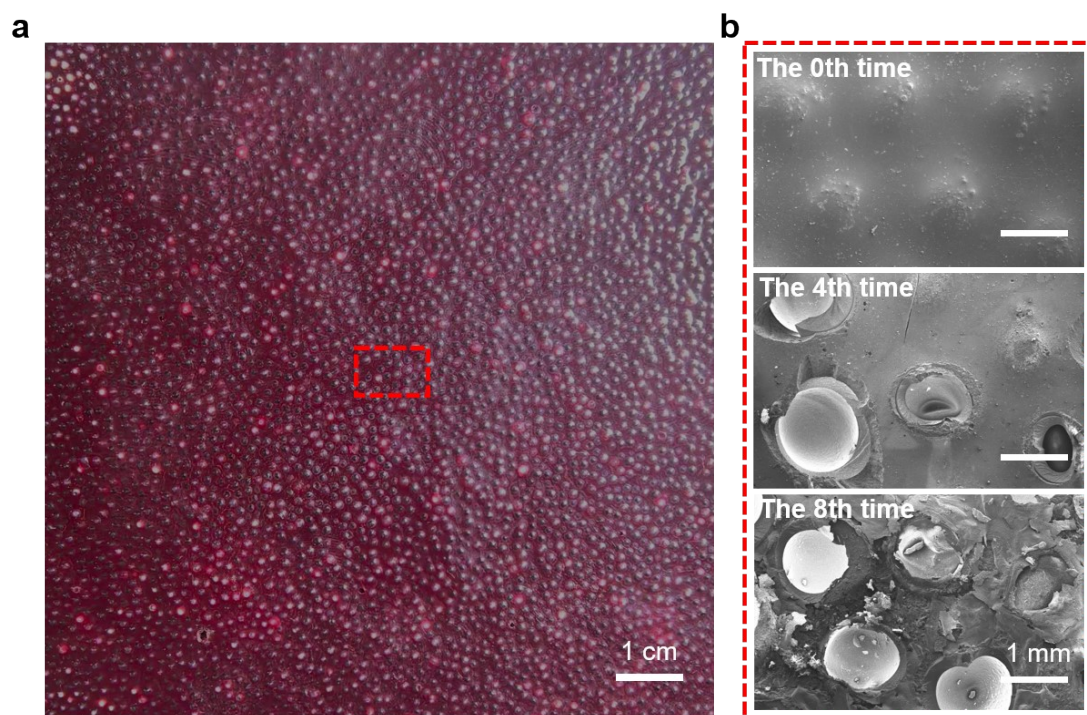

**Fig. S4** SEM images of fire extinguishing patch before and after repeated use. (a) Fire extinguishing patch and central observation area; (b) SEM images of the same central area of the patch after 0, 4, and 8 usage cycles.



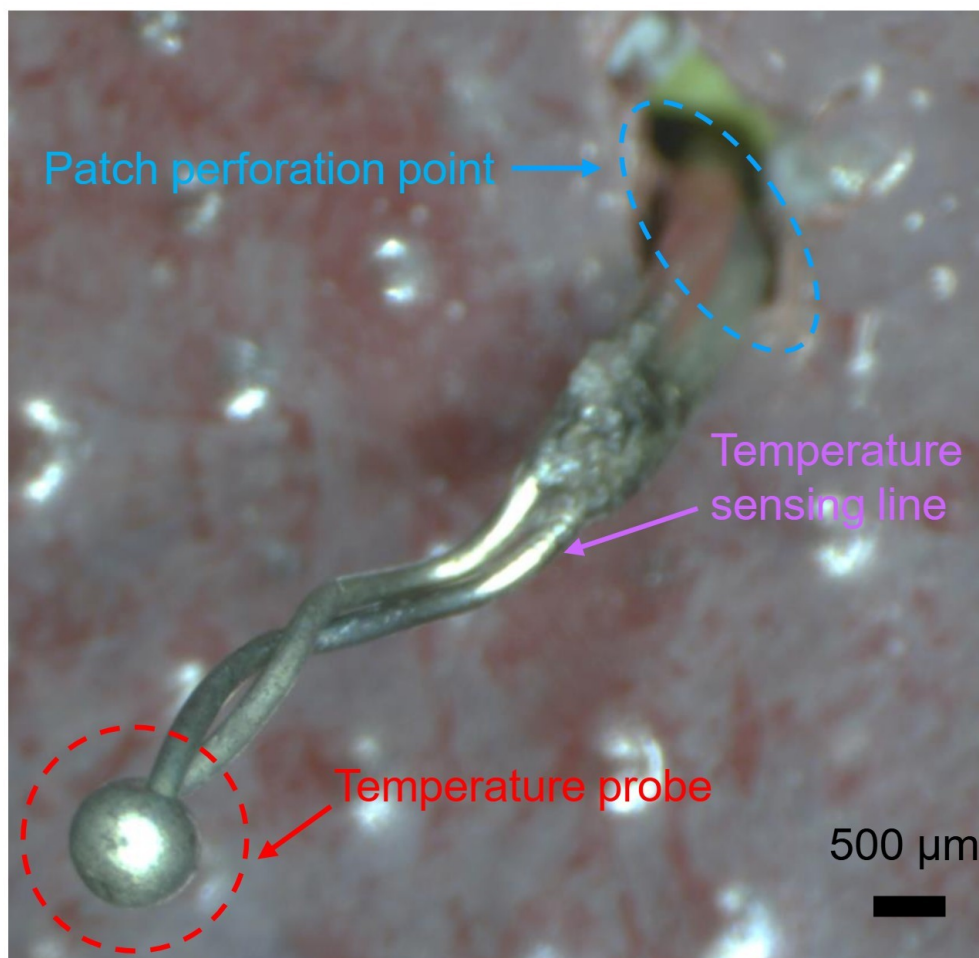

**Fig. S5** Detail diagram of temperature sensing probe for integrated fire extinguishing device.

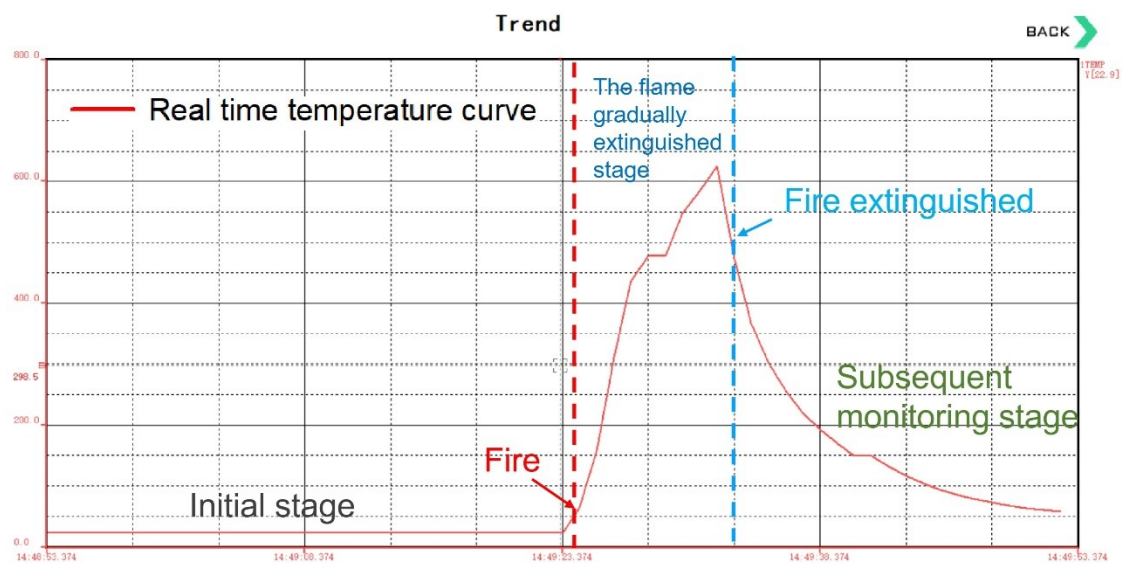

**Fig. S6** Original real-time temperature curve for fire extinguishing application of electric meter box.

**Table. S1** Comparison of co-flow microfluidic technology and other preparation methods

| Preparation method                | Shell materials                      | Core materials                                                            | CV value | References        |
|-----------------------------------|--------------------------------------|---------------------------------------------------------------------------|----------|-------------------|
| Complex coalescence method        | Sodium hexametaphosphate and gelatin | perfluorohexanone                                                         | >5%      | 1.                |
| Situ polymerization method        | Melamine–urea–formaldehyde resin     | perfluorohexanone、heptafluorocyclopentane、2-bromo-3,3,3-trifluoropropene) | 5%       | 2.                |
| Interfacial polymerization method | Polyurea                             | perfluorohexanone                                                         | >5%      | 3.                |
| Emulsification method             | Photosensitive resin                 | perfluorohexanone                                                         | >5%      | 4.                |
| Co-flow method                    | Photosensitive resin                 | perfluorohexanone /Novec 7100                                             | 3%       | <b>This study</b> |



**Table. S2** Brief introduction of technical specifications of temperature sensor in integrated fire extinguishing system.

| Measuring range | Communication distance | Response delay | Measurement accuracy | Transmit power | Measurement interval | Battery capacity |
|-----------------|------------------------|----------------|----------------------|----------------|----------------------|------------------|
| -50°C~1350°C    | 0~1.5 km               | $\leq 1.5$ s   | $\pm 0.5$ °C         | $\leq 100$ mW  | 1 s                  | 8 Ah             |

**Table. S3** Computer interface image for temperature alarm

| date       | time     | name  | introduction | value | unit | limiting<br>value | type          | level         | confirm |
|------------|----------|-------|--------------|-------|------|-------------------|---------------|---------------|---------|
| 2024/12/18 | 14:49:44 | A1001 | 1TEMP        | 157.5 | °C   | 100.000           | high<br>alarm | emergenc<br>y | restore |

**Table. S4** Comparison results between this study and other integrated fire extinguishing systems

| Overall size of system | Alarm response time | Response delay from alarm to agent release | Response time of agent release | Reusability | Wireless real-time monitoring | References        |
|------------------------|---------------------|--------------------------------------------|--------------------------------|-------------|-------------------------------|-------------------|
| Large                  | -                   | -                                          | -                              | No          | No                            | 5.                |
| Large                  | -                   | -                                          | -                              | No          | No                            | 6.                |
| Medium                 | $\leq 1.5$ s        | $\leq 1.5$ s                               | $\leq 1$ s                     | No          | Yes                           | 7.                |
| Medium                 | $\sim 1.5$ s        | Total time $\sim 1.7$ s                    |                                | No          | Yes                           | 8.                |
| Large                  | $5.8 \pm 0.3$ s     | -                                          | -                              | No          | Yes                           | 9.                |
| Small                  | -                   | -                                          | 0.06 ms                        | Yes         | No                            | 10.               |
| Small                  | -                   | -                                          | 0.06 ms                        | Yes         | No                            | 11.               |
| Small                  | $\leq 1.5$ s        | 0 s                                        | 0.075 ms                       | Yes         | Yes                           | <b>This study</b> |

## References

1. Han Z, Li Z, Yang J. Highly effective suppression of accidental combustion and explosion on B/KNO<sub>3</sub> by perfluorohexanone microcapsule [J]. *Fuel* **386**, 134305 (2025).
2. Liu H, Zhang T, Zhang M, Zhang C, Guo Z, Zhang Y, Chen H, Wu Y, Zhang G. Preparation and thermal responsiveness of microencapsulated fluorinated liquids for automatic fire extinguishing [J]. *Heliyon* **10**, e27454 (2024).
3. Xiao Y, Pan Y, Yang J, et al. Enhanced safety of lithium-ion batteries by a novel bifunctional aerogel sheet coated with fire extinguishing microcapsules [J]. *Chemical Engineering Journal* **516**, 164014 (2025).
4. QI L, XING Z, WU J, et al. Preparation and characterization of PFMP@GE microcapsules for enhancing the safety of UV-curable polymers [J]. *Reactive and Functional Polymers* **205**, 106042 (2024).
5. Zhou G, Li Y, Liu Y, Kong Y, Dao v, Yuan S, Meng Q, Niu C, Mou Z, Yang S, Zhang Q. Preparation of environment-friendly gel-protein foam and its fire suppression performance for lithium-ion batteries. *Fuel* **384**, 133979 (2025).
6. Xu C, Li Y, Zhang X, Zhang Y, Shen G, Shi J, Mi B. Preparation and characterization of fire-extinguishing efficiency of novel gel foam for lithium-ion battery fires. *Process Safety and Environmental Protection* **197**, 106999 (2025).
7. Meng Y, Wu Y, Qin F, Si Y, Zhong L, Yu H. Design of an Intelligent Trigger-Based Automatic Fire Suppression and Alarm Localization System for Smart

- Meter Boxes. In: 2025 5th *Power System and Green Energy Conference (PSGEC)* (2025).
8. Habib MR, Khan N, Ahmed K, Kiran MR, Asif A.K.M., Bhuiyan MI. Quick Fire Sensing Model and Extinguishing by Using an Arduino Based Fire Protection Device. In: 2019 5th *International Conference on Advances in Electrical Engineering (ICAEE)* (2019).
  9. Lee S, Yun H, Sim Y, Lee S. Design and Validation of an Edge-AI Fire Safety System with SmartThings Integration for Accelerated Detection and Targeted Suppression. *Applied Sciences* **15**, 8118 (2025).
  10. Pan Q, Sang N, Zhou T, Wu C, Si T, Huang F, Zhu Z. Array-structured microcapsule fibers for efficient fire extinguishing in confined spaces. *Lab on a Chip* **25**, 2193-2204 (2025).
  11. Ren Y, Zhang P, Bian H, Ding D, Li C, Sang N, Zhang J, Huang F, Zhu Z. Enhancing fire suppression in restricted spaces with fine water mist microcapsules. *Chemical Engineering Journal* 503, 158422 (2025).

## **2. Supporting Movies**

**Movie S1** High speed photography captures the complete process of high-performance microcapsule explosion wax extinguishing candle flame.

**Movie S2** The complete process of comparing the fire extinguishing performance of five groups of capsules.

**Movie S3** The complete process of repeatedly extinguishing fires with a fire extinguishing patch.

**Movie S4** Comparison of fire extinguishing performance of fire extinguishing patches for fires in different locations.

**Movie S5** Integrated fire extinguishing device applied to the complete process of actual fire in the electric meter box.
